# Supplementary material
Source: MDPI journal article supplement (https://www.mdpi.com/2073-4395/11/7/1287)
Supplement: s1 [file s1]

**Supplementary Table 1.** Weather parameters during crop growth stages

| Environments                                                    | Soil type               | Season    | Months | Temperature (°C) |       |       | Rainfall (mm) | Crop growth stages               |
|-----------------------------------------------------------------|-------------------------|-----------|--------|------------------|-------|-------|---------------|----------------------------------|
|                                                                 |                         |           |        | Max              | Min   | Mean  |               |                                  |
| Tamil Nadu Rice Research Institute, Aduthurai (E1)              | Alluvial clay (pH: 7.5) | Rabi 2014 | Jan-14 | 29.71            | 22.32 | 26.02 | 7.68          | Sowing and vegetative stage      |
|                                                                 |                         |           | Feb-14 | 31.87            | 23.22 | 27.55 | 6.72          | Flowering and reproductive stage |
|                                                                 |                         |           | Mar-14 | 34.24            | 24.83 | 29.54 | 6.17          | Maturity and harvesting          |
|                                                                 |                         |           | Mean   | 31.94            | 23.46 | 27.70 |               |                                  |
|                                                                 |                         |           | Total  |                  |       |       | 20.57         |                                  |
| Soil and Water Management Research Institute, Kattuthottam (E2) | Sandy loam (pH: 6.9)    | Rabi 2014 | Jan-14 | 30.66            | 21.16 | 25.91 | 11.96         | Sowing and vegetative stage      |
|                                                                 |                         |           | Feb-14 | 33.36            | 22.01 | 27.69 | 24.93         | Flowering and reproductive stage |
|                                                                 |                         |           | Mar-14 | 36.03            | 23.49 | 29.76 | 25.75         | Maturity and harvesting          |
|                                                                 |                         |           | Mean   | 33.35            | 22.22 | 27.79 |               |                                  |
|                                                                 |                         |           | Total  |                  |       |       | 62.64         |                                  |
| National Pulses Research Centre (E3)                            | Red lateritic (pH: 6.5) | Rabi 2014 | Jan-14 | 28.58            | 23.35 | 25.97 | 0.83          | Sowing and vegetative stage      |
|                                                                 |                         |           | Feb-14 | 30.29            | 23.81 | 27.05 | 20.26         | Flowering and reproductive stage |
|                                                                 |                         |           | Mar-14 | 32.63            | 25.29 | 28.96 | 2.48          | Maturity and harvesting          |
|                                                                 |                         |           | Mean   | 30.50            | 24.15 | 27.33 |               |                                  |
|                                                                 |                         |           | Total  |                  |       |       | 23.57         |                                  |

Note: Min, Minimum; Max, Maximum

**Supplementary Table 2.** Estimates of mean values, range, broad sense heritability ( $h^2_b$  %) for eight yield-related traits in the  $M_2$  generation of blackgram cultivars viz., ADT3, CO6 and TU 17-9 (continued)

| Varieties |                          | cv. ADT3         |                |                |                |                | cv. Co 6         |                |                |                |                | cv. TU 17-9      |                |                |                |                |
|-----------|--------------------------|------------------|----------------|----------------|----------------|----------------|------------------|----------------|----------------|----------------|----------------|------------------|----------------|----------------|----------------|----------------|
| Traits    | Treatments<br>Parameters | Control<br>(CV1) | 200 Gy<br>(A1) | 300 Gy<br>(A2) | 400 Gy<br>(A3) | 500 Gy<br>(A4) | Control<br>(CV2) | 200 Gy<br>(C1) | 300 Gy<br>(C2) | 400 Gy<br>(C3) | 500 Gy<br>(C4) | Control<br>(CV3) | 200 Gy<br>(T1) | 300 Gy<br>(T2) | 400 Gy<br>(T3) | 500 Gy<br>(T4) |
| PH        | Mean                     | 31.00            | 26.08          | 26.03          | 26.22          | 24.95          | 27.66            | 26.71          | 26.33          | 27.32          | 24.94          | 30.42            | 26.85          | 24.97          | 27.51          | 25.05          |
|           | Min                      |                  | 3.00           | 17.50          | 16.60          | 16.00          |                  | 2.68           | 15.40          | 17.80          | 17.20          |                  | 12.00          | 14.20          | 14.00          | 12.70          |
|           | Max                      |                  | 44.20          | 39.20          | 44.00          | 65.00          |                  | 37.40          | 39.20          | 45.20          | 33.80          |                  | 55.20          | 37.10          | 61.20          | 40.20          |
|           | Her                      |                  | 50.92          | 28.66          | 32.53          | 65.40          |                  | 67.12          | 66.28          | 69.79          | 38.09          |                  | 68.71          | 46.87          | 75.65          | 54.22          |
|           | % deviation              |                  | -15.87         | -16.03         | -15.42         | -19.52         |                  | -3.43          | -4.81          | -1.23          | -9.83          |                  | -11.74         | -17.92         | -9.57          | -17.65         |
| NB        | Mean                     | 4.00             | 2.99           | 2.43           | 2.19           | 2.05           | 3.70             | 2.58           | 2.60           | 2.31           | 2.22           | 3.00             | 2.20           | 1.94           | 2.22           | 1.96           |
|           | Min                      |                  | 1.00           | 1.00           | 1.00           | 1.00           |                  | 1.00           | 1.00           | 1.00           | 0.00           |                  | 1.00           | 1.00           | 0.00           | 1.00           |
|           | Max                      |                  | 6.00           | 4.00           | 5.00           | 5.00           |                  | 5.00           | 8.00           | 6.00           | 5.00           |                  | 5.00           | 4.00           | 6.00           | 4.00           |
|           | Her                      |                  | 65.67          | 7.83           | 43.32          | 11.60          |                  | 60.56          | 72.83          | 60.92          | 50.53          |                  | 53.85          | 32.89          | 65.77          | 33.14          |
|           | % deviation              |                  | -25.25         | -39.25         | -45.25         | -48.75         |                  | -30.27         | -29.73         | -37.57         | -40.00         |                  | -26.67         | -35.33         | -26.00         | -34.67         |
| NC        | Mean                     | 14.00            | 12.97          | 14.06          | 13.87          | 14.10          | 13.20            | 12.18          | 11.64          | 12.87          | 10.94          | 12.16            | 12.45          | 10.93          | 13.19          | 11.21          |
|           | Min                      |                  | 4.00           | 5.00           | 5.00           | 4.00           |                  | 4.00           | 4.00           | 5.00           | 5.00           |                  | 4.00           | 3.00           | 3.00           | 2.00           |
|           | Max                      |                  | 24.00          | 34.00          | 28.00          | 29.00          |                  | 27.00          | 21.00          | 29.00          | 23.00          |                  | 32.00          | 21.00          | 30.00          | 22.00          |
|           | Her                      |                  | 39.70          | 64.85          | 32.49          | 49.37          |                  | 49.99          | 17.29          | 56.19          | 11.89          |                  | 39.71          | 6.70           | 54.45          | 43.25          |
|           | % deviation              |                  | -7.36          | +0.43          | -0.93          | +0.71          |                  | -7.73          | -11.82         | -2.50          | -17.12         |                  | +2.38          | -10.12         | +8.47          | -7.81          |
| PC        | Mean                     | 5.00             | 4.51           | 4.41           | 4.32           | 4.18           | 5.40             | 5.18           | 5.12           | 5.21           | 5.04           | 4.16             | 3.89           | 3.69           | 4.01           | 3.91           |
|           | Min                      |                  | 2.00           | 3.00           | 2.00           | 3.00           |                  | 2.00           | 3.00           | 2.00           | 3.00           |                  | 2.00           | 2.00           | 2.00           | 2.00           |
|           | Max                      |                  | 6.00           | 6.00           | 6.00           | 5.00           |                  | 8.00           | 8.00           | 9.00           | 10.00          |                  | 7.00           | 6.00           | 7.00           | 7.00           |
|           | Her                      |                  | 78.24          | 56.11          | 66.74          | 40.64          |                  | 34.06          | 36.32          | 46.90          | 48.17          |                  | 54.03          | 44.44          | 59.25          | 57.80          |
|           | % deviation              |                  | -9.80          | -11.80         | -13.60         | -16.40         |                  | -4.07          | -5.19          | -3.52          | -6.67          |                  | -6.49          | -11.30         | -3.61          | -6.01          |

**Supplementary Table 2.** Estimates of mean values, range, broad sense heritability ( $h^2_b$  %) for eight yield-related traits in the M<sub>2</sub> generation of blackgram cultivars viz., ADT3, CO6 and TU 17-9

| Varieties |                       | cv. ADT3      |             |             |             |             | cv. Co 6      |             |             |             |             | cv. TU 17-9   |             |             |             |             |
|-----------|-----------------------|---------------|-------------|-------------|-------------|-------------|---------------|-------------|-------------|-------------|-------------|---------------|-------------|-------------|-------------|-------------|
| Traits    | Treatments Parameters | Control (CV1) | 200 Gy (A1) | 300 Gy (A2) | 400 Gy (A3) | 500 Gy (A4) | Control (CV2) | 200 Gy (C1) | 300 Gy (C2) | 400 Gy (C3) | 500 Gy (C4) | Control (CV3) | 200 Gy (T1) | 300 Gy (T2) | 400 Gy (T3) | 500 Gy (T4) |
| NPP       | Mean                  | 38.00         | 37.63       | 36.72       | 36.61       | 39.01       | 42.30         | 36.20       | 33.36       | 38.33       | 29.49       | 33.58         | 29.22       | 24.83       | 32.53       | 25.65       |
|           | Min                   |               | 10.00       | 14.00       | 17.00       | 10.00       |               | 11.00       | 3.90        | 11.00       | 11.00       |               | 11.00       | 5.00        | 6.00        | 4.00        |
|           | Max                   |               | 80.00       | 101.00      | 85.00       | 102.00      |               | 76.00       | 70.00       | 102.00      | 58.00       |               | 69.00       | 57.00       | 92.00       | 60.00       |
|           | Her                   |               | 63.71       | 68.51       | 44.14       | 71.66       |               | 83.12       | 76.31       | 88.73       | 62.09       |               | 44.86       | 11.32       | 61.65       | 37.39       |
|           | % deviation           |               | -0.97       | -3.37       | -3.66       | +2.66       |               | -14.42      | -21.13      | -9.39       | -30.28      |               | -12.98      | -26.06      | -3.13       | -23.62      |
| PL        | Mean                  | 5.30          | 4.42        | 4.41        | 5.13        | 5.23        | 4.46          | 4.10        | 4.23        | 4.15        | 4.06        | 5.73          | 3.96        | 3.85        | 4.03        | 3.88        |
|           | Min                   |               | 3.40        | 1.60        | 4.00        | 4.00        |               | 3.60        | 3.20        | 3.20        | 3.00        |               | 3.20        | 2.90        | 3.00        | 2.60        |
|           | Max                   |               | 5.20        | 5.00        | 6.00        | 7.00        |               | 5.20        | 5.00        | 5.20        | 4.80        |               | 4.80        | 4.40        | 4.90        | 4.80        |
|           | Her                   |               | 31.34       | 63.42       | 49.96       | 60.11       |               | 20.48       | 28.93       | 31.69       | 36.47       |               | 31.52       | 26.70       | 30.28       | 50.09       |
|           | % deviation           |               | -16.60      | -16.79      | -3.21       | -1.32       |               | -8.07       | -5.16       | -6.95       | -8.97       |               | -30.89      | -32.81      | -29.67      | -32.29      |
| NS        | Mean                  | 7.00          | 7.02        | 6.32        | 6.95        | 7.05        | 6.60          | 6.59        | 6.70        | 6.40        | 6.35        | 6.25          | 6.34        | 6.09        | 6.39        | 6.17        |
|           | Min                   |               | 4.00        | 3.00        | 5.00        | 5.00        |               | 4.00        | 5.00        | 4.00        | 4.00        |               | 4.00        | 4.00        | 4.00        | 3.00        |
|           | Max                   |               | 8.00        | 8.00        | 10.00       | 10.00       |               | 8.00        | 8.00        | 8.00        | 8.00        |               | 8.00        | 7.00        | 8.00        | 8.00        |
|           | Her                   |               | 59.96       | 64.91       | 78.20       | 80.17       |               | 45.22       | 55.25       | 57.42       | 64.68       |               | 40.64       | 31.93       | 16.47       | 63.26       |
|           | % deviation           |               | +0.29       | -9.71       | -0.71       | +0.71       |               | -0.15       | +1.52       | -3.03       | -3.79       |               | +1.44       | -2.56       | +2.24       | -1.28       |
| SPY       | Mean                  | 8.70          | 7.74        | 7.48        | 6.96        | 7.52        | 9.21          | 7.13        | 7.08        | 7.02        | 5.38        | 8.79          | 6.03        | 5.03        | 6.98        | 4.81        |
|           | Min                   |               | 1.85        | 2.30        | 2.41        | 1.84        |               | 3.13        | 1.33        | 1.08        | 1.95        |               | 1.31        | 0.43        | 0.49        | 0.55        |
|           | Max                   |               | 16.71       | 15.77       | 14.45       | 19.61       |               | 17.99       | 13.99       | 19.57       | 11.20       |               | 17.31       | 15.31       | 20.61       | 11.03       |
|           | Her                   |               | 94.21       | 92.11       | 89.49       | 94.11       |               | 85.58       | 80.36       | 87.44       | 61.32       |               | 79.33       | 69.21       | 82.58       | 64.74       |
|           | % deviation           |               | -11.03      | -14.02      | -20.00      | -13.56      |               | -22.58      | -23.13      | -23.78      | -41.59      |               | -31.40      | -42.78      | -20.59      | -45.28      |

**Supplementary Table 3.** Estimates of mean values, range, broad sense heritability ( $h^2_b$  %) for eight yield-related traits in the  $M_3$  generation of blackgram cultivars viz., ADT3, CO6 and TU 17-9 (continued)

| Varieties |                          | cv. ADT 3        |                |                |                |                | cv. Co 6         |                |                |                |                | cv. TU 17-9      |                |                |                |                |
|-----------|--------------------------|------------------|----------------|----------------|----------------|----------------|------------------|----------------|----------------|----------------|----------------|------------------|----------------|----------------|----------------|----------------|
| Traits    | Treatments<br>Parameters | Control<br>(CV2) | 200 Gy<br>(A1) | 300 Gy<br>(A2) | 400 Gy<br>(A3) | 500 Gy<br>(A4) | Control<br>(CV2) | 200 Gy<br>(C1) | 300 Gy<br>(C2) | 400 Gy<br>(C3) | 500 Gy<br>(C4) | Control<br>(CV3) | 200 Gy<br>(T1) | 300 Gy<br>(T2) | 400 Gy<br>(T3) | 500 Gy<br>(T4) |
| PH        | Mean                     | 33.30            | 24.92          | 24.04          | 21.66          | 21.32          | 27.00            | 27.22          | 26.36          | 24.62          | 24.52          | 19.00            | 34.58          | 30.37          | 29.64          | 30.63          |
|           | Min                      |                  | 12.00          | 13.00          | 13.00          | 13.00          |                  | 14.00          | 15.00          | 12.00          | 13.00          |                  | 21.00          | 20.00          | 21.00          | 20.00          |
|           | Max                      |                  | 42.00          | 42.00          | 30.00          | 33.00          |                  | 60.00          | 50.00          | 44.00          | 46.00          |                  | 50.00          | 42.00          | 42.00          | 55.00          |
|           | Her                      |                  | 84.82          | 78.18          | 65.74          | 68.50          |                  | 76.12          | 67.59          | 59.77          | 57.64          |                  | 86.87          | 78.39          | 80.10          | 84.86          |
|           | % deviation              |                  | -25.17         | -27.81         | -34.95         | -35.98         |                  | 0.81           | -2.37          | -8.81          | -9.19          |                  | 82.00          | 59.84          | 56.00          | 61.21          |
| NB        | Mean                     | 3.40             | 2.60           | 2.22           | 1.90           | 2.02           | 2.60             | 2.56           | 2.76           | 2.76           | 2.34           | 3.20             | 2.32           | 2.04           | 2.46           | 2.41           |
|           | Min                      |                  | 1.00           | 1.00           | 0.00           | 0.00           |                  | 0.00           | 1.00           | 1.00           | 1.00           |                  | 0.00           | 0.00           | 1.00           | 0.00           |
|           | Max                      |                  | 6.00           | 5.00           | 4.00           | 5.00           |                  | 8.00           | 6.00           | 6.00           | 5.00           |                  | 6.00           | 4.00           | 6.00           | 5.00           |
|           | Her                      |                  | 70.25          | 62.13          | 59.57          | 58.63          |                  | 78.62          | 74.81          | 74.95          | 66.26          |                  | 79.33          | 64.48          | 68.57          | 78.62          |
|           | % deviation              |                  | -23.53         | -34.71         | -44.12         | -40.59         |                  | -1.54          | 6.15           | 6.15           | -10.00         |                  | -27.50         | -36.25         | -23.13         | -24.69         |
| NC        | Mean                     | 8.40             | 8.42           | 8.94           | 8.20           | 8.44           | 11.20            | 11.48          | 12.62          | 10.02          | 10.22          | 10.60            | 10.98          | 8.73           | 9.72           | 12.20          |
|           | Min                      |                  | 3.00           | 3.00           | 3.00           | 3.00           |                  | 5.00           | 4.00           | 3.00           | 3.00           |                  | 4.00           | 2.00           | 2.00           | 3.00           |
|           | Max                      |                  | 21.00          | 19.00          | 20.00          | 21.00          |                  | 24.00          | 30.00          | 18.00          | 18.00          |                  | 26.00          | 21.00          | 24.00          | 38.00          |
|           | Her                      |                  | 69.83          | 59.75          | 47.59          | 77.34          |                  | 71.90          | 69.25          | 61.42          | 62.11          |                  | 75.64          | 62.94          | 75.71          | 76.93          |
|           | % deviation              |                  | 0.24           | 6.43           | -2.38          | 0.48           |                  | 2.50           | 12.68          | -10.54         | -8.75          |                  | 3.58           | -17.64         | -8.30          | 15.09          |
| PC        | Mean                     | 2.10             | 2.34           | 2.36           | 2.34           | 2.56           | 2.70             | 2.84           | 2.82           | 2.88           | 2.64           | 2.80             | 2.72           | 2.43           | 2.50           | 2.72           |
|           | Min                      |                  | 2.00           | 2.00           | 2.00           | 1.00           |                  | 2.00           | 2.00           | 2.00           | 2.00           |                  | 1.00           | 1.00           | 1.00           | 2.00           |
|           | Max                      |                  | 3.00           | 3.00           | 4.00           | 4.00           |                  | 4.00           | 4.00           | 4.00           | 4.00           |                  | 4.00           | 4.00           | 4.00           | 4.00           |
|           | Her                      |                  | 63.03          | 59.45          | 60.89          | 77.14          |                  | 82.70          | 84.67          | 37.97          | 80.26          |                  | 81.90          | 75.56          | 83.58          | 79.29          |
|           | % deviation              |                  | 11.43          | 12.38          | 11.43          | 21.90          |                  | 5.19           | 4.44           | 6.67           | -2.22          |                  | -2.86          | -13.21         | -10.71         | -2.86          |

**Supplementary Table 3.** Estimates of mean values, range, broad sense heritability ( $h^2_b$  %) for eight yield-related traits in the  $M_3$  generation of blackgram cultivars viz., ADT3, CO6 and TU 17-9

| Varieties  |             | cv. ADT<br>3         |                |                   |                   |                   | cv. Co<br>6          |                |                   |                   |                   | cv. TU 17-9          |                   |                   |                   |                   |
|------------|-------------|----------------------|----------------|-------------------|-------------------|-------------------|----------------------|----------------|-------------------|-------------------|-------------------|----------------------|-------------------|-------------------|-------------------|-------------------|
| Trait<br>s | Treatments  | Contro<br>l<br>(CV1) | 200 Gy<br>(A1) | 300<br>Gy<br>(A2) | 400<br>Gy<br>(A3) | 500<br>Gy<br>(A4) | Contro<br>l<br>(CV2) | 200 Gy<br>(C1) | 300<br>Gy<br>(C2) | 400<br>Gy<br>(C3) | 500<br>Gy<br>(C4) | Contro<br>l<br>(CV3) | 200<br>Gy<br>(T1) | 300<br>Gy<br>(T2) | 400<br>Gy<br>(T3) | 500<br>Gy<br>(T4) |
| NPP        | Mean        | 16.30                | 15.82          | 17.63             | 16.78             | 18.88             | 27.00                | 26.72          | 27.50             | 22.98             | 22.08             | 22.60                | 25.78             | 18.71             | 22.00             | 27.74             |
|            | Min         |                      | 5.00           | 5.00              | 8.00              | 5.00              |                      | 9.00           | 11.00             | 7.00              | 5.00              |                      | 7.00              | 5.00              | 2.00              | 7.00              |
|            | Max         |                      | 46.00          | 46.00             | 36.00             | 53.00             |                      | 67.00          | 52.00             | 51.00             | 42.00             |                      | 60.00             | 56.00             | 77.00             | 75.00             |
|            | Her         |                      | 79.43          | 80.55             | 60.98             | 85.17             |                      | 82.58          | 63.78             | 69.38             | 64.25             |                      | 81.49             | 61.64             | 79.92             | 79.31             |
|            | % deviation |                      | -2.94          | 8.16              | 2.94              | 15.83             |                      | -1.04          | 1.85              | -14.89            | -18.22            |                      | 14.07             | -17.21            | -2.65             | 22.74             |
| PL         | Mean        | 5.39                 | 4.66           | 4.70              | 4.54              | 4.60              | 4.25                 | 4.47           | 4.42              | 4.51              | 4.67              | 4.12                 | 4.34              | 4.54              | 4.55              | 4.62              |
|            | Min         |                      | 3.20           | 2.50              | 2.40              | 2.70              |                      | 2.40           | 3.20              | 3.00              | 3.10              |                      | 3.30              | 3.10              | 3.10              | 3.40              |
|            | Max         |                      | 6.40           | 5.60              | 5.60              | 6.10              |                      | 6.10           | 5.30              | 5.50              | 6.50              |                      | 5.60              | 5.60              | 6.20              | 5.90              |
|            | Her         |                      | 80.73          | 77.02             | 80.81             | 80.19             |                      | 89.67          | 65.91             | 80.88             | 87.89             |                      | 65.32             | 77.68             | 74.35             | 60.20             |
|            | % deviation |                      | -13.54         | -12.80            | -15.77            | -14.66            |                      | 5.18           | 4.00              | 6.12              | 9.88              |                      | 5.34              | 10.19             | 10.44             | 12.14             |
| NS         | Mean        | 5.70                 | 6.22           | 6.32              | 6.22              | 6.32              | 6.40                 | 5.94           | 5.90              | 6.64              | 6.78              | 6.60                 | 6.16              | 6.10              | 5.96              | 6.28              |
|            | Min         |                      | 5.00           | 4.00              | 5.00              | 4.00              |                      | 4.00           | 3.00              | 5.00              | 5.00              |                      | 4.00              | 4.00              | 4.00              | 5.00              |
|            | Max         |                      | 8.00           | 7.00              | 7.00              | 8.00              |                      | 7.00           | 7.00              | 9.00              | 9.00              |                      | 7.00              | 8.00              | 8.00              | 8.00              |
|            | Her         |                      | 75.79          | 78.27             | 64.94             | 79.58             |                      | 66.42          | 60.53             | 81.87             | 76.51             |                      | 63.52             | 75.34             | 61.87             | 63.52             |
|            | % deviation |                      | 9.12           | 10.88             | 9.12              | 10.88             |                      | -7.19          | -7.81             | 3.75              | 5.94              |                      | -6.67             | -7.58             | -9.70             | -4.85             |
| SPY        | Mean        | 1.65                 | 1.31           | 1.83              | 2.03              | 3.14              | 2.24                 | 5.11           | 4.92              | 3.71              | 3.32              | 4.10                 | 2.02              | 2.29              | 2.78              | 3.36              |
|            | Min         |                      | 0.06           | 0.26              | 0.53              | 0.39              |                      | 1.39           | 0.99              | 0.44              | 0.60              |                      | 0.08              | 0.19              | 0.12              | 0.87              |
|            | Max         |                      | 4.98           | 5.27              | 5.33              | 8.07              |                      | 17.03          | 10.79             | 9.98              | 7.15              |                      | 6.17              | 8.99              | 10.56             | 9.46              |
|            | Her         |                      | 74.10          | 81.66             | 76.28             | 92.40             |                      | 87.39          | 85.69             | 81.65             | 69.77             |                      | 62.37             | 67.65             | 80.54             | 77.50             |
|            | % deviation |                      | -20.61         | 10.91             | 23.03             | 90.30             |                      | 128.13         | 119.64            | 65.63             | 48.21             |                      | -50.73            | -44.15            | -32.20            | -18.05            |

**Supplementary Table 4.** Contribution of varying gamma doses/irradiation causing distinct morphological mutations in M<sub>2</sub> generation

| Type of mutants               | cv. ADT 3 |        |        |        | Total | cv. Co 6 |        |        |        | Total | cv. TU 17-9 |        |        |        | Total |
|-------------------------------|-----------|--------|--------|--------|-------|----------|--------|--------|--------|-------|-------------|--------|--------|--------|-------|
| Radiation doses               | 200 Gy    | 300 Gy | 400 Gy | 500 Gy |       | 200 Gy   | 300 Gy | 400 Gy | 500 Gy |       | 200 Gy      | 300 Gy | 400 Gy | 500 Gy |       |
| M <sub>2</sub> plant examined | 1440      | 1363   | 1034   | 1026   | 4863  | 1371     | 1200   | 1124   | 871    | 4566  | 608         | 579    | 410    | 399    | 1996  |
| Tall                          | -         | 4      | -      | 1      | 5     | -        | -      | 1      | 1      | 2     | -           | 2      | 2      | -      | 4     |
| Dwarf                         | -         | -      | -      | 1      | 1     | 1        | -      | 2      | -      | 3     | -           | -      | -      | -      | 0     |
| Erect stem                    | 1         | 2      | -      | -      | 3     | -        | -      | -      | -      | 0     | 6           | 4      | 5      | -      | 15    |
| Spreading stem                | -         | -      | -      | 1      | 1     | -        | 1      | -      | -      | 1     | -           | -      | -      | -      | 0     |
| Open type stem                | -         | 1      | 1      | -      | 2     | -        | -      | -      | -      | 0     | -           | -      | -      | -      | 0     |
| Green stem                    | -         | -      | 1      | -      | 1     | -        | -      | -      | -      | 0     | -           | -      | -      | 1      | 1     |
| Pink stem                     | 1         | -      | -      | -      | 1     | -        | -      | -      | -      | 0     | -           | -      | -      | -      | 0     |
| Branching pattern changed     | -         | -      | -      | -      | 0     | -        | -      | 3      | -      | 3     | -           | -      | -      | -      | 0     |
| Crinkled & leathery leaf      | -         | 1      | 2      | 1      | 4     | -        | -      | -      | -      | 0     | -           | -      | -      | -      | 0     |
| Narrow leaf                   | -         | 3      | -      | -      | 3     | -        | 1      | -      | -      | 1     | 1           | 1      | -      | -      | 2     |
| Ovate leaf                    | -         | 2      | -      | -      | 2     | -        | -      | -      | -      | 0     | -           | -      | -      | -      | 0     |
| Pink margin leaf              | -         | -      | 1      | 1      | 2     | -        | -      | -      | -      | 0     | -           | -      | 3      | -      | 3     |
| Single foliate leaf           | -         | -      | 1      | -      | 1     | -        | -      | -      | -      | 0     | -           | -      | -      | -      | 0     |
| Early maturity                | -         | 3      | 1      | 2      | 6     | 2        | 4      | -      | -      | 6     | 1           | 1      | -      | 4      | 6     |
| Glaborous                     | -         | -      | 1      | -      | 1     | -        | -      | -      | -      | 0     | -           | -      | -      | -      | 0     |
| Hairy pods                    | -         | -      | -      | -      | 0     | -        | -      | -      | -      | 0     | -           | -      | -      | -      | 0     |
| Increased pods numbers        | 14        | 11     | 6      | 9      | 40    | 10       | 6      | 7      | 5      | 28    | 3           | 4      | 3      | 4      | 14    |
| Increased pod length          | 1         | 1      | 2      | -      | 4     | -        | -      | 2      | 1      | 3     | 1           | -      | -      | -      | 1     |
| Short pods                    | 1         | 2      | 1      | -      | 4     | 1        | -      | 1      | 1      | 3     | -           | -      | -      | -      | 0     |
| Pod colour changed            | -         | 1      | 1      | 1      | 3     | -        | -      | -      | 3      | 3     | -           | -      | -      | -      | 0     |
| Bold seeds                    | 1         | -      | -      | -      | 1     | 2        | 3      | 2      | -      | 7     | -           | -      | -      | -      | 0     |
| Small seeds                   | 2         | -      | -      | -      | 2     | -        | -      | -      | -      | 0     | -           | -      | -      | -      | 0     |
| Brown seeds                   | -         | 1      | 1      | -      | 2     | -        | -      | -      | 1      | 1     | -           | -      | -      | 1      | 1     |
| Sterile plant                 | 1         | -      | -      | -      | 1     | -        | -      | -      | -      | 0     | -           | -      | 1      | -      | 1     |
| Leafy plant                   | -         | -      | -      | 1      | 1     | -        | -      | 1      | -      | 1     | -           | -      | -      | -      | 0     |
| Total                         | 22        | 32     | 19     | 18     | 91    | 16       | 15     | 19     | 12     | 62    | 12          | 12     | 14     | 10     | 48    |
| Frequency (%)                 | 1.53      | 2.35   | 1.84   | 1.76   | 7.48  | 1.17     | 1.25   | 1.69   | 1.38   | 5.49  | 1.97        | 2.07   | 3.41   | 2.51   | 9.96  |

**Supplementary Table 5.** Contribution of varying gamma doses/irradiation causing different morphological mutations in M<sub>3</sub> and M<sub>4</sub> generations

| Radiation doses | M <sub>3</sub> |        |        |        |       | M <sub>4</sub> |        |        |        |       |
|-----------------|----------------|--------|--------|--------|-------|----------------|--------|--------|--------|-------|
|                 | 200 Gy         | 300 Gy | 400 Gy | 500 Gy | Total | 200 Gy         | 300 Gy | 400 Gy | 500 Gy | Total |
| cv. ADT3        | 58             | 52     | 64     | 82     | 256   | 5              | 4      | 5      | 7      | 21    |
| cv. Co6         | 45             | 47     | 42     | 38     | 172   | 2              | 2      | 3      | 1      | 8     |
| cv. TU17-9      | 28             | 31     | 35     | 21     | 115   | 1              | 1      | 2      | 3      | 7     |
| Total           | 131            | 130    | 141    | 141    | 543   | 8              | 7      | 10     | 11     | 36    |
